# Supplementary figures and images for: Impact of Variation in Amylose Content on Durum Wheat Svevo Technological and Starch Properties
Source: Preprints.org preprint supplement (doi:10.20944/preprints202310.1288.v1), 2023-10-19

**Figure S1**. Glutopeak torque curves for Svevo samples.


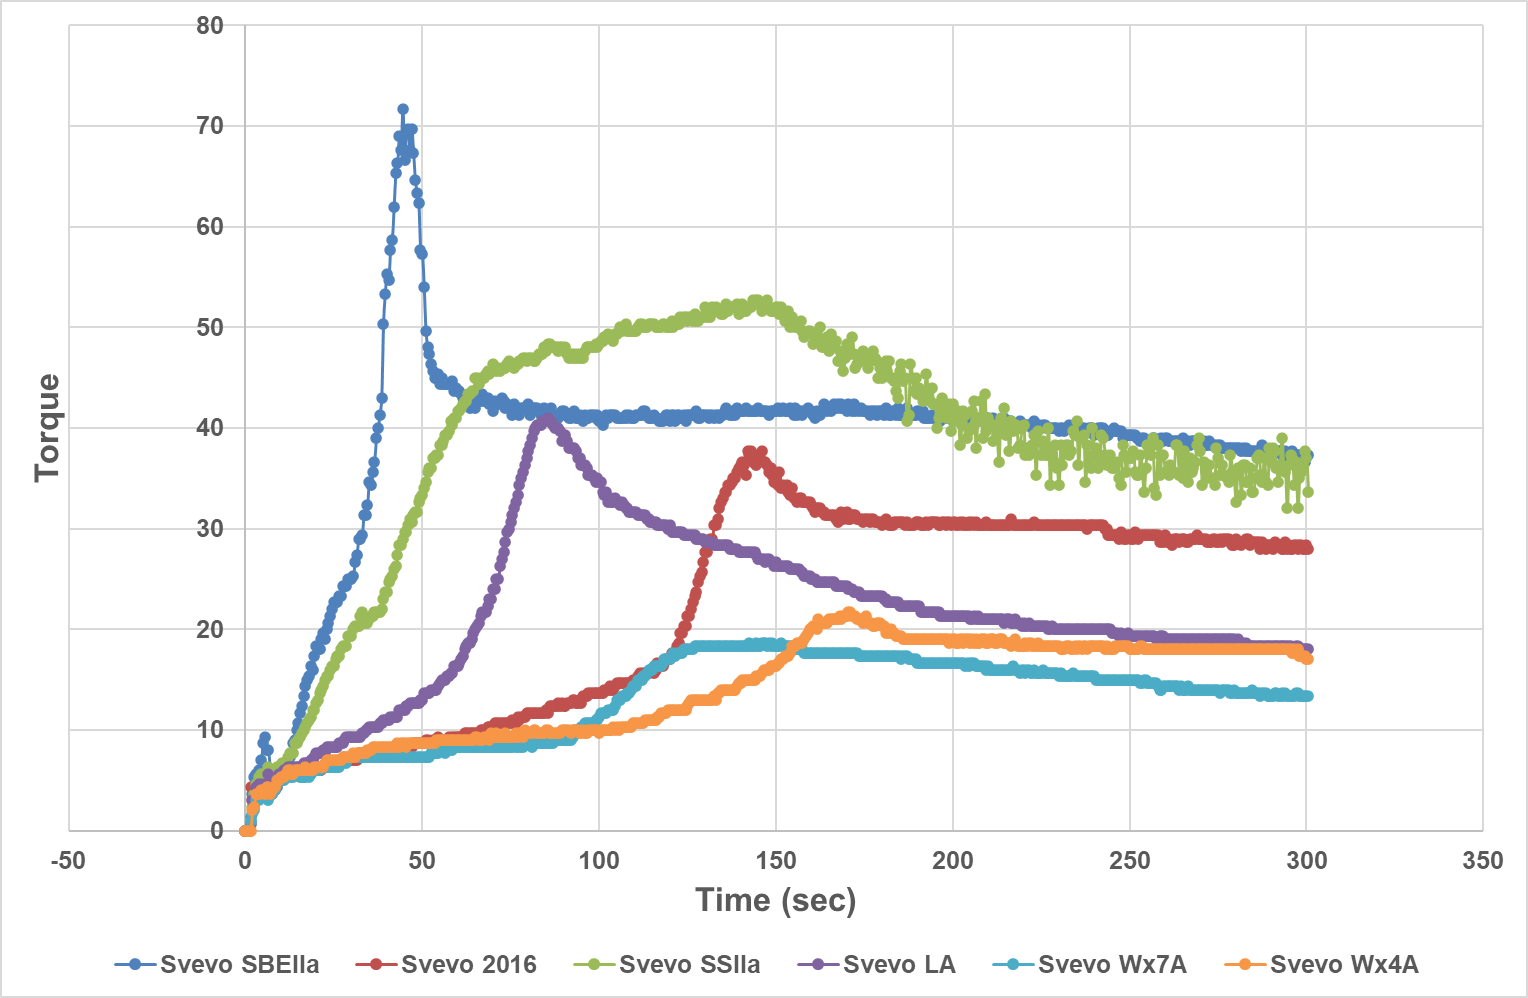

Supplement: Supplementary file 1 [file supplementary]
